# Supplementary material for: Genetic clines across the Atlantic-Mediterranean transition in the harbour crab Liocarcinus depurator
Source: Research Square preprint supplement (doi:10.21203/rs.3.rs-4020756/v1), 2024-03-27
Supplement: Supplementary file 1 [file f4e7d42a26dfa239ee564420.xlsx]

## Sheet: Hoja1
SI Appendix. Individual data information. Individual identifier (ID), sampling year and location (Lat, Long) and Area acronym. Haplotype name of the Cytochromo oxidase I as in public databases (COI-HAP), Probability of Atlantic assignment based on COI (COI-QvalueATL), Probability of Atlantic assignment based on all microsatellites (SSR-QvalueATL), Probability of Atlantic assignment based on micro…
ID	Year	Lat	Long	Area	COI_HAP	COI-QvalueATL	SSR-QvalueATL	No_Ldep11	Only_Ldep11	Ldep01	Ldep01	Ldep02	Ldep02	Ldep03	Ldep03	Ldep04	Ldep04	Ldep05	Ldep05	Ldep06	Ldep06	Ldep07	Ldep07	Ldep08	Ldep08	Ldep09	Ldep09	Ldep10	Ldep10	Ldep11	Ldep11	CS	RW1	RW2	ScaledRW1	ScaledRW2	Size
WALE01	2008	53.5343	-4.1311	WALE	Ldep_31	0.9647	0.9017	0.3664	0.9893	127	148	311	311	257	261	104	116	118	118	171	171	259	261	148	148	274	277	294	317	149	149
WALE02	2008	53.5343	-4.1311	WALE	Ldep_08	0.9961	0.9112	0.3208	0.9906	135	148	311	311	252	255	113	119	118	121	175	191	261	266	148	148	0	0	297	308	149	152
WALE03	2008	53.5343	-4.1311	WALE	Ldep_06	0.9805	0.9581	0.2065	0.9896	156	156	311	311	270	270	119	119	118	118	165	179	266	266	148	148	0	0	294	304	149	149
WALE04	2008	53.5343	-4.1311	WALE	Ldep_32	0.9959	0.916	0.4351	0.9906	127	140	302	311	246	255	119	125	110	124	175	177	261	261	148	148	0	0	306	306	149	155
WALE05	2008	53.5343	-4.1311	WALE	Ldep_33	0.9965	0.905	0.3322	0.9907	131	131	311	311	249	260	119	119	118	118	177	181	259	264	148	148	0	0	304	322	149	155
WALE06	2008	53.5343	-4.1311	WALE	Ldep_03	0.9951	0.9477	0.2367	0.9906	140	148	311	311	249	257	119	119	118	118	175	177	261	262	148	148	277	277	295	317	149	155
WALE07	2008	53.5343	-4.1311	WALE	Ldep_34	0.9954	0.9461	0.2748	0.9894	118	135	311	311	249	249	119	122	112	118	165	175	258	266	148	148	0	0	272	299	149	149
WALE08	2008	53.5343	-4.1311	WALE	Ldep_06	0.9805	0.9482	0.2617	0.9894	144	160	311	314	249	252	119	119	118	124	165	175	258	258	148	148	274	277	272	308	149	149
WALE09	2008	53.5343	-4.1311	WALE	Ldep_35	0.9961	0.9551	0.2216	0.9894	118	168	311	311	255	264	119	119	118	118	165	175	266	266	148	148	0	0	295	304	149	149
WALE10	2008	53.5343	-4.1311	WALE	Ldep_08	0.9961	0.9134	0.3536	0.9906	152	190	311	311	257	261	119	119	118	118	173	173	259	261	148	148	274	277	316	322	149	155
WALE11	2008	53.5343	-4.1311	WALE	Ldep_03	0.9952	0.8819	0.4311	0.9895	122	140	267	311	255	255	119	122	118	121	175	175	259	268	145	148	274	274	278	302	149	149
WALE12	2008	53.5343	-4.1311	WALE	Ldep_32	0.996	0.9403	0.3748	0.9905	135	148	311	311	255	258	119	119	108	124	153	171	261	261	148	148	274	274	286	296	149	155
WALE13	2008	53.5343	-4.1311	WALE	Ldep_06	0.9806	0.949	0.2916	0.9893	148	148	311	311	264	270	119	122	124	188	165	175	258	261	145	148	274	274	350	310	149	149
WALE14	2008	53.5343	-4.1311	WALE	Ldep_36	0.9965	0.9504	0.1977	0.9894	140	152	311	311	249	258	119	119	118	118	173	175	264	266	148	148	274	274	310	312	149	149
WALE15	2008	53.5343	-4.1311	WALE	Ldep_33	0.9963	0.9508	0.2496	0.9893	148	144	311	314	255	258	119	122	118	118	165	175	258	261	148	148	274	274	350	310	149	149
WALE16	2008	53.5343	-4.1311	WALE	Ldep_08	0.9962	0.9239	0.2689	0.9895	156	185	311	311	255	264	113	113	118	118	173	175	264	266	148	148	274	274	310	312	149	149
WALE17	2008	53.5343	-4.1311	WALE	Ldep_08	0.9962	0.8993	0.3834	0.9904	140	144	311	311	258	267	110	119	115	118	169	175	266	266	148	148	274	274	296	296	149	152
WALE18	2008	53.5343	-4.1311	WALE	Ldep_37	0.9966	0.9173	0.3325	0.9912	118	148	311	309	261	264	119	125	118	118	153	153	259	266	148	148	274	277	284	322	155	155
WALE19	2008	53.5343	-4.1311	WALE			0.9449	0.4136	0.9905	127	140	301	311	246	255	119	125	108	124	175	177	261	261	145	148	274	274	304	341	149	155
WALE20	2008	53.5343	-4.1311	WALE			0.9491	0.2504	0.9911	144	156	311	311	252	264	119	119	121	121	171	171	264	264	148	148	274	277	284	304	155	155
WALE21	2008	53.5343	-4.1311	WALE			0.9248	0.3539	0.9905	144	181	311	311	243	255	119	122	112	118	171	175	259	262	145	148	274	274	323	323	149	155
WALE22	2008	53.5343	-4.1311	WALE	Ldep_38	0.9926	0.9238	0.2737	0.9902	140	164	304	311	264	249	119	119	118	118	175	179	262	266	148	148	274	274	297	308	149	152
WALE23	2008	53.5343	-4.1311	WALE	Ldep_08	0.996	0.9401	0.2207	0.9903	135	148	311	311	252	255	113	119	118	121	175	179	261	266	148	148	274	274	298	308	149	152
WALE24	2008	53.5343	-4.1311	WALE			0.9376	0.3192	0.9906	122	148	283	311	249	252	125	125	118	118	175	175	258	261	148	148	0	0	312	280	149	155
WALE25	2008	53.5343	-4.1311	WALE	Ldep_39	0.9967	0.9206	0.3116	0.9906	0	0	301	301	249	270	113	116	118	150	173	175	264	264	148	148	0	0	294	310	155	158
WALE26	2008	53.5343	-4.1311	WALE	Ldep_40	0.9655	0.9503	0.2373	0.9906	140	156	269	311	255	266	119	119	110	118	175	175	258	262	145	148	0	0	304	304	149	152
WALE27	2008	53.5343	-4.1311	WALE			0.9465	0.2491	0.9894	140	148	311	311	249	270	113	119	118	118	171	175	258	268	148	148	0	0	309	312	149	149
WALE28	2008	53.5343	-4.1311	WALE			0.9198	0.3188	0.9906	122	144	311	311	252	255	119	125	118	118	177	177	258	264	148	148	0	0	294	320	149	155
WALE29	2008	53.5343	-4.1311	WALE	Ldep_08	0.9962	0.9471	0.2952	0.9894	140	144	311	311	264	267	119	119	118	139	171	171	261	266	148	148	274	274	284	323	149	149
WALE30	2008	53.5343	-4.1311	WALE	Ldep_08	0.9961	0.8978	0.402	0.9906	118	127	269	311	264	270	119	122	118	118	175	194	261	261	148	148	274	277	295	342	149	155
CANT01	2010	43.7545	-5.407	CANT	Ldep_41	0.9904																										463.093	0.00139734	0.00733432	0.585912	0.634632	40
CANT02	2010	43.7545	-5.407	CANT																												540.004	-0.0319893	0.0060495	0.225849	0.616362	44
CANT03	2010	43.7545	-5.407	CANT	Ldep_03	0.9888																										509.112	0.0182696	-0.0148971	0.767873	0.318511	45
CANT04	2010	43.7327	-6.28367	CANT	Ldep_01	0.9915	0.7836	0.5883	0.9815	0	0	311	311	0	0	122	122	108	115	165	175	256	264	148	148	274	277	294	302	155	155	555.68	0.0238434	0.00436044	0.827985	0.592345	48
CANT05	2010	43.7327	-6.28367	CANT	Ldep_01	0.9912																										524.784	-0.0208779	0.0126386	0.345681	0.710057	43
CANT06	2010	43.7327	-6.28367	CANT	Ldep_03	0.9888																										581.687	-0.000261038	0.00671711	0.568027	0.625856	48
CANT07	2010	43.7327	-6.28367	CANT	Ldep_03	0.9887																										537.636	0.0270711	0.0218348	0.862795	0.840824	47
CANT08	2010	43.7327	-6.28367	CANT	Ldep_03	0.989																										532.667	0.00169869	-0.00409098	0.589162	0.472169	45
CANT09	2010	43.7387	-7.00367	CANT	Ldep_42	0.9902																										554.027	0.0365694	0.015935	0.965231	0.75693	47
CANT10	2010	43.7387	-7.00367	CANT	Ldep_43	0.7567	0.6926	0.6964	0.9801	0	0	311	311	0	0	119	113	108	108	175	175	249	249	145	148	261	262	297	300	149	155	552.853	-0.0394583	0.0104696	0.145299	0.679214	45
CANT11	2010	43.7387	-7.00367	CANT	Ldep_01	0.9912																										572.532	-0.00698926	-0.00989655	0.495466	0.389616	49
CANT12	2010	43.7387	-7.00367	CANT	Ldep_03	0.9887																										487.874	-0.0121732	0.00355366	0.439559	0.580873	41
CANT13	2010	43.7387	-7.00367	CANT	Ldep_03	0.9887	0.734	0.5837	0.9774	144	173	311	311	252	257	122	119	110	118	171	177	261	261	148	148	274	274	348	350	149	149	580.997	0.0167063	0.000306977	0.751014	0.534706	50
CANT14	2010	43.7387	-7.00367	CANT	Ldep_01	0.9913	0.764	0.5162	0.98	164	164	269	311	249	258	113	119	118	118	175	179	261	264	148	148	263	263	310	312	149	155	473.834	-0.0224842	0.00529324	0.328358	0.605609	40
CANT15	2010	43.7387	-7.00367	CANT	Ldep_01	0.9911	0.8406	0.4258	0.9771	140	152	311	311	249	266	113	119	110	124	175	177	261	264	148	148	274	274	294	312	149	149	479.924	-0.0315996	0.0017817	0.230052	0.555676	41
CANT16	2010	43.7387	-7.00367	CANT	Ldep_03	0.9887	0.7135	0.5504	0.977	122	127	311	311	257	264	116	119	112	118	167	175	259	259	148	151	274	277	294	298	149	149	516.475	0.0243921	-0.0100386	0.833903	0.387597	45
CANT17	2010	43.7387	-7.00367	CANT	Ldep_27	0.9911	0.5894	0.6538	0.9772	127	135	311	311	261	261	110	119	118	118	175	177	259	259	148	151	271	274	312	341	149	149	500.437	0.0065179	-0.000962694	0.641136	0.516652	43
CANT18	2010	44.0475	-8.30183	CANT																												501.067	0.00942881	-0.00199984	0.672529	0.501904	41
CANT19	2010	44.0475	-8.30183	CANT	Ldep_44	0.7961																										648.079	-0.0335784	0.00432897	0.208711	0.591897	53
CANT20	2010	43.8862	-8.51083	CANT																												516.278	-0.0191127	0.0137298	0.364719	0.725573	43
CANT21	2010	43.8862	-8.51083	CANT																												585.649	0.0226411	0.0102352	0.815019	0.675881	50
CANT22	2010	43.8862	-8.51083	CANT																												559.476	0.00193331	-0.00279907	0.591693	0.490539	47
CANT23	2010	43.8862	-8.51083	CANT			0.7682	0.49	0.9799	140	193	311	311	252	252	119	122	118	118	177	177	258	259	148	148	274	277	284	304	149	155	589.411	-0.0287047	0.0100486	0.261272	0.673229	49
CANT24	2010	43.8862	-8.51083	CANT			0.8413	0.3984	0.9799	135	140	311	311	255	255	119	122	118	124	173	175	259	261	148	148	274	274	310	312	149	155	525.159	5.76954e-06	-0.0127554	0.570905	0.348965	44
CANT25	2010	44.0247	-8.586	CANT	Ldep_01	0.9913	0.729	0.5595	0.9798	135	152	311	314	252	255	116	119	118	118	177	179	249	259	148	148	274	277	304	316	149	155	600.779	0.00471987	0.000899094	0.621745	0.543126	50
CANT26	2010	43.8922	-5.591	CANT	Ldep_03	0.9889	0.7954	0.499	0.9799	144	144	311	311	252	264	119	119	118	118	175	175	250	261	148	148	274	274	286	298	149	155	590.136	-0.0245614	-0.0003811	0.305957	0.524922	49
CANT27	2010	43.6953	-8.743	CANT	Ldep_03	0.989	0.6548	0.6052	0.9771	144	144	311	311	255	252	119	116	118	118	177	181	260	266	148	148	277	277	270	270	149	149	644.854	-0.0216128	-0.00695002	0.337756	0.431515	53
CANT28	2010	43.3037	-9.2845	CANT	Ldep_45	0.9905																										507.397	0.0297346	-0.00135053	0.891519	0.511137	44
CANT29	2010	43.6043	-8.917	CANT	Ldep_46	0.9871																										620.232	0.0139386	-0.0206571	0.721165	0.236606	53
CANT30	2010	43.3605	-8.76167	CANT	Ldep_01	0.9913																										557.461	0.0169506	-0.00802265	0.753649	0.416262	48
CADI08	2010	36.0533	-6.36333	CADI																												543.491	0.00413411	-0.00534157	0.615427	0.454386	45
CADI10	2010	36.0533	-6.36333	CADI																												547.519	-0.0271593	0.00330063	0.277939	0.577275	44
CADI11	2010	36.0533	-6.36333	CADI																												604.046	-0.00110784	0.0132187	0.558895	0.718305	50
CADI12	2010	36.0533	-6.36333	CADI																												460.837	-0.0272076	0.0116884	0.277418	0.696545	37
CADI14	2010	36.0533	-6.36333	CADI																												589.564	0.0397934	0.00623002	1	0.618929	49
CADI16	2010	36.0533	-6.36333	CADI																												533.232	0.00478303	-0.000647823	0.622426	0.521129	44
CADI17	2010	36.0533	-6.36333	CADI																												552.929	0.0348984	0.00163122	0.947209	0.553536	47
CADI20	2010	36.0533	-6.36333	CADI																												550.578	0.0245663	0.00254388	0.835781	0.566514	46
CADI21	2010	36.0533	-6.36333	CADI																												526.768	0.0302515	0.0233137	0.897094	0.861853	44
CADI22	2010	36.0533	-6.36333	CADI																												408.549	0.00387056	0.0288616	0.612585	0.940741	33
CADI23	2010	36.0533	-6.36333	CADI																												489.972	-0.0247005	0.00577217	0.304456	0.612419	40
CADI24	2010	36.0533	-6.36333	CADI																												594.882	-0.0123826	-0.000429641	0.4373	0.524232	49
CADI25	2010	36.0533	-6.36333	CADI																												481.611	-0.0193073	0.00992662	0.362621	0.671493	40
CADI26	2010	36.0533	-6.36333	CADI																												551.848	0.0311393	0.00743758	0.906669	0.6361	47
CADI28	2010	36.0533	-6.36333	CADI																												492.03	-0.0208247	0.0041273	0.346256	0.58903	41
CADI47	2010	36.0533	-6.36333	CADI																												566.904	-0.0258734	-0.00111889	0.291807	0.514431	46
CADI48	2010	36.0533	-6.36333	CADI																												418.849	-0.00385542	0.0296262	0.529263	0.951614	35
CADI49	2010	36.0533	-6.36333	CADI																												530.253	-0.00185471	0.00937102	0.55084	0.663593	44
CADI50	2010	36.0533	-6.36333	CADI																												443.483	-0.0242674	0.0146881	0.309128	0.739199	50
CADI51	2010	36.3757	-6.6572	CADI	Ldep_03	0.9969	0.6015	0.5433	0.9416	135	140	283	311	255	283	110	119	124	124	175	175	262	262	148	148	277	277	296	300	149	155	493.545	0.0100138	0.0279797	0.678837	0.9282	38
CADI52	2010	36.4565	-6.761	CADI	Ldep_03	0.9968	0.5479	0.5449	0.9416	140	154	311	311	255	261	116	119	118	118	167	175	258	264	148	148	0	0	295	301	149	155	491.886	-0.0237247	0.0248573	0.31498	0.883801	37
CADI53	2010	36.961	-7.2108	CADI	Ldep_03	0.997	0.458	0.6362	0.7094	152	152	311	311	255	267	119	119	118	150	175	177	259	264	148	148	274	277	297	309	149	153	679.478	-0.00634818	-0.00496608	0.50238	0.459726	54
CADI54	2010	36.961	-7.2108	CADI	Ldep_09	0.9953	0.488	0.677	0.9416	144	152	280	311	243	255	119	125	110	110	179	181	264	264	145	148	277	277	280	311	149	155	544.466	0.00972897	-0.00676837	0.675766	0.434098	42
CADI55	2010	36.961	-7.2108	CADI	Ldep_47	0.9972	0.5142	0.5	0.5492	140	148	311	311	255	258	110	122	118	118	175	177	256	258	148	148	274	274	295	300	149	150	515.171	-0.0314259	-0.00183755	0.231925	0.504212	39
CADI56	2010	36.961	-7.2108	CADI	Ldep_03	0.9968	0.4662	0.6672	0.8959	140	173	311	311	260	267	107	125	110	118	165	165	258	261	148	148	273	277	333	312	140	149	540.819	-0.00600421	-0.0199548	0.506089	0.246593	43
CADI57	2010	36.7815	-6.9543	CADI	Ldep_48	0.9968	0.4934	0.6718	0.9417	144	190	311	311	261	283	119	134	112	118	175	185	261	261	148	148	274	277	327	304	149	155	525.307	0.0205609	-0.00148396	0.792585	0.50924	42
CADI58	2010	36.961	-7.2108	CADI	Ldep_03	0.9969	0.4296	0.651	0.9303	135	148	311	311	255	258	125	125	118	118	175	175	259	269	148	148	274	274	315	326	149	149	482.224	-0.0257137	0.011749	0.293529	0.697407	37
CADI59	2010	36.961	-7.2108	CADI	Ldep_03	0.9968	0.6913	0.4099	0.9416	144	168	311	311	252	255	119	119	112	121	175	175	258	258	148	148	277	277	298	312	149	155	580.295	0.00525322	-0.0113088	0.627497	0.369535	45
CADI60	2010	36.961	-7.2108	CADI	Ldep_03	0.997	0.4235	0.6684	0.9475	131	148	269	311	258	276	119	119	118	174	175	177	264	264	148	148	274	277	301	301	155	155	514.204	0.0258428	-0.00256201	0.849548	0.49391	41
CADI61	2010	36.6	-6.8217	CADI	Ldep_03	0.9968	0.4755	0.678	0.9381	138	144	311	311	239	270	113	122	118	132	165	175	264	268	148	148	274	274	306	306	149	158	557.884	-0.0282834	0.010108	0.265816	0.674072	42
CADI62	2010	36.6	-6.8217	CADI	Ldep_03	0.9968	0.6289	0.5417	0.9477	140	160	311	311	255	263	119	122	118	121	165	175	258	259	148	148	277	277	360	312	155	155	607.198	0.00271761	-0.000416248	0.600151	0.524422	36
CADI63	2010	36.6	-6.8217	CADI	Ldep_03	0.9968	0.5614	0.5814	0.9473	135	148	311	311	260	264	122	122	118	139	173	177	262	268	148	148	0	0	310	314	155	155
CADI64	2010	36.6	-6.8217	CADI																												465.327	0.00664424	0.0194294	0.642498	0.806619	36
CADI65	2010	36.8432	-7.0088	CADI			0.5449	0.6588	0.947	135	142	311	311	249	249	110	113	121	124	173	179	256	260	148	148	274	274	323	345	152	155	468.547	0.0374538	0.0158885	0.974768	0.756269	36
CADI66	2010	36.8432	-7.0088	CADI	Ldep_03	0.9969	0.6538	0.5189	0.9474	140	140	311	311	249	263	119	119	118	118	173	179	261	264	148	148	277	277	295	360	155	155	513.91	0.0241556	-0.00782298	0.831352	0.419102	40
CADI67	2010	36.8432	-7.0088	CADI	Ldep_49	0.9974	0.3954	0.7187	0.9418	156	160	269	311	258	261	122	122	157	121	169	179	258	261	148	148	0	0	307	358	149	155	496.694	0.0110297	-0.00111905	0.689794	0.514429	39
CADI68	2010	36.8432	-7.0088	CADI			0.5164	0.6684	0.9299	140	144	311	311	246	273	116	122	124	124	175	183	258	261	148	148	0	0	281	326	149	149	515.041	0.000131546	0.00806278	0.572261	0.644991	39
CADI69	2010	36.8432	-7.0088	CADI			0.4883	0.6336	0.9417	135	176	311	311	261	266	119	119	118	118	177	177	261	262	148	157	274	289	294	294	149	155	499.4	0.0269933	-0.00153149	0.861956	0.508564	39
CADI70	2010	36.8432	-7.0088	CADI	Ldep_03	0.9968	0.403	0.7191	0.9303	144	168	311	311	239	258	113	119	128	128	177	177	259	259	148	148	274	274	302	314	149	149	565.199	0.00139161	-0.0038714	0.585851	0.475291	39
CADI71	2010	36.6	-6.8217	CADI	Ldep_50	0.9978	0.4123	0.6284	0.3588	148	156	311	314	246	258	110	113	118	124	169	181	258	266	148	148	274	277	291	296	150	153	438.943	-0.0288221	0.0287635	0.260007	0.939346	34
CADI73	2010	36.6	-6.8217	CADI	Ldep_01	0.9978	0.6876	0.4606	0.9419	140	190	311	311	249	252	119	119	118	139	175	177	258	261	148	148	274	277	295	295	149	155
CADI74	2010	36.6	-6.8217	CADI	Ldep_03	0.9968	0.6639	0.5593	0.9478	144	148	311	311	243	264	119	122	118	124	175	179	259	259	148	148	274	274	341	323	155	155	548.893	-0.00777786	-0.0102318	0.486961	0.384849	43
CADI75	2010	36.73	-6.8167	CADI	Ldep_03	0.9969	0.4145	0.5538	0.2934	148	176	311	311	243	264	113	125	118	118	171	177	258	258	148	148	274	274	295	285	150	150
CADI76	2010	36.73	-6.8167	CADI																												552.743	0.010324	-0.0299836	0.682183	0.103988	44
CADI77	2010	36.6	-6.8217	CADI																												489.776	0.00588596	0.00887602	0.63432	0.656554	38
CADI78	2010	36.6	-6.8217	CADI																												484.827	0.0364912	0.00360131	0.964388	0.58155	39
CADI79	2010	36.6	-6.8217	CADI																												425.119	0.00813286	0.0133904	0.658553	0.720747	33
CADI80	2010	36.74	-6.75	CADI																												509.815	0.0248566	0.00481467	0.838912	0.598804	40
CADI81	2010	36.655	-6.8017	CADI																												484.15	-0.00292367	-0.00824495	0.539312	0.413101	38
CADI82	2010	36.6	-6.8217	CADI																												492.185	-0.00817992	-0.010736	0.482625	0.37768	38
CADI83	2010	36.73	-6.8167	CADI	Ldep_03	0.9968	0.5682	0.5392	0.9477	140	164	311	311	251	252	119	122	118	121	175	181	259	266	148	148	274	274	295	316	155	155
CADI84	2010	36.655	-6.8017	CADI																												550.224	0.024889	0.00856486	0.839262	0.65213	44
CADI85	2010	36.74	-6.75	CADI																												587.816	-0.00420384	-0.0138244	0.525506	0.333764	46
CADI87	2010	36.5095	-6.7533	CADI																												535.552	-0.0259178	-0.00131154	0.291328	0.511692	41
CADI88	2010	36.5095	-6.7533	CADI																												506.759	0.0136897	-0.00680105	0.718481	0.433633	39
CADI89	2010	36.5095	-6.7533	CADI																												444.041	0.0242384	0.000136326	0.832245	0.53228	35
CADI90	2010	36.73	-6.8167	CADI	Ldep_03	0.9969																										557.514	-0.0362699	0.00555633	0.179685	0.60935	43
CADI91	2010	36.5095	-6.7533	CADI																												575.531	-0.016403	0.00798095	0.393942	0.643827	44
CADI92	2010	36.6	-6.8217	CADI	Ldep_03	0.9968	0.5037	0.5107	0.7091	135	160	311	314	252	258	125	125	118	128	175	175	258	258	148	148	274	274	294	302	149	153	512.651	-0.0167347	0.0130482	0.390365	0.715881	39
CADI93	2010	36.6	-6.8217	CADI	Ldep_37	0.9981																										431.242	0.0281897	-0.00887506	0.874858	0.404141	34
CADI94	2010	36.5095	-6.7533	CADI																												476.855	0.0192492	0.00300118	0.778438	0.573017	40
WALB01	2009	36.5467	-4.441	WALB	Ldep_51	0.9938	0.2285	0.7816	0.5304	122	173	301	311	252	252	122	125	118	118	177	177	260	261	148	148	277	277	303	303	149	150	486.752	-0.020287	0.000323216	0.352054	0.534937	47
WALB02	2009	36.5467	-4.441	WALB	Ldep_35	0.9945	0.2241	0.7317	0.388	135	156	311	311	255	264	116	119	118	118	167	175	261	261	151	154	274	274	326	326	150	150	434.602	0.0207376	0.0128228	0.79449	0.712675	41
WALB03	2009	36.5467	-4.441	WALB																												453.052	0.00470896	0.0243753	0.621627	0.876947	50
WALB04	2009	36.5467	-4.441	WALB																												536.151	-0.0275607	0.00309646	0.27361	0.574371	35
WALB05	2009	36.5467	-4.441	WALB																												433.296	-0.0133512	0.033029	0.426855	1	38
WALB06	2009	36.5467	-4.441	WALB																												551.142	0.00656332	-0.00171205	0.641626	0.505996	36
WALB07	2009	36.5467	-4.441	WALB																												637.318	0.0283335	-0.0108719	0.876409	0.375747	41
WALB08	2009	36.5467	-4.441	WALB			0.3777	0.6935	0.7639	140	148	311	311	252	261	107	116	118	121	175	175	260	261	148	148	274	277	295	343	149	155	390.845	0.0238886	0.0132915	0.828473	0.71934	34
WALB09	2009	36.5467	-4.441	WALB	Ldep_52	0.0087	0.2767	0.7959	0.5767	127	140	311	314	258	258	116	119	108	108	177	181	259	261	148	148	274	277	346	327	150	155	439.876	0.0222335	0.0146155	0.810623	0.738168	34
WALB10	2009	36.5467	-4.441	WALB	Ldep_01	0.9948	0.2844	0.7014	0.5304	135	140	311	311	260	261	119	122	114	118	175	177	260	262	148	148	274	274	299	312	149	150	513.727	0.0175941	0.00264484	0.760589	0.56795	30
WALB11	2009	36.5467	-4.441	WALB	Ldep_53	0.9956	0.3891	0.6859	0.7397	127	144	311	311	264	270	119	119	118	118	163	173	260	264	148	148	277	277	284	299	149	149	477.403	0.00696604	0.0233233	0.645969	0.861989	33
WALB12	2009	36.5467	-4.441	WALB	Ldep_02	0.0111	0.3548	0.706	0.7639	140	148	311	311	264	264	113	119	110	118	175	177	259	265	148	148	274	277	311	331	149	155	599.251	0.00701929	-0.00337217	0.646543	0.48239	43
WALB13	2009	36.5467	-4.441	WALB																												424.749	-0.0314677	0.0301875	0.231474	0.959594	34
WALB14	2009	36.5467	-4.441	WALB																												645.828	-0.0270768	-0.00483501	0.278829	0.461589	34
WALB15	2009	36.5467	-4.441	WALB																												438.294	-0.0164362	0.00959171	0.393584	0.666731	40
WALB16	2009	36.5467	-4.441	WALB																												518.052	-0.00196106	0.0164618	0.549693	0.764421	37
WALB17	2009	36.5467	-4.441	WALB	Ldep_01	0.9947	0.3338	0.5822	0.3882	144	148	311	311	252	258	119	122	118	118	175	181	261	261	148	148	274	274	296	304	150	150	472.703	-0.0249224	-0.00207712	0.302063	0.500805	41
WALB18	2009	36.5467	-4.441	WALB	Ldep_03	0.9926	0.3828	0.7701	0.7808	168	168	311	314	255	263	113	119	118	118	171	177	260	260	148	148	274	274	281	308	155	155	506.793	0.0227081	0.0314322	0.815741	0.977294	33
WALB19	2009	36.5467	-4.441	WALB	Ldep_02	0.011	0.2222	0.7649	0.4113	127	140	269	311	252	279	119	119	110	118	173	177	260	265	145	148	274	274	347	306	150	153	443.957	0.00883926	0.025328	0.666171	0.890495	50
WALB20	2009	36.5445	-4.5525	WALB	Ldep_03	0.9927	0.2838	0.7748	0.7399	144	152	311	314	243	276	113	119	118	124	175	177	267	267	148	148	274	274	299	306	149	149	573.031	0.0207461	-0.00243566	0.794581	0.495707	48
WALB21	2009	36.5445	-4.5525	WALB			0.4721	0.6255	0.7399	144	144	269	311	252	270	122	122	118	118	173	179	262	266	145	148	274	277	306	306	149	149	549.842	-0.00540362	0.00459057	0.512566	0.595617	35
WALB22	2009	36.5445	-4.5525	WALB			0.3771	0.6505	0.7399	135	158	311	311	249	261	119	119	118	118	165	175	264	264	148	148	277	277	337	308	149	149
WALB23	2009	36.5445	-4.5525	WALB																												590.53	0.0300921	-0.0118517	0.895376	0.361815	40
WALB24	2009	36.5445	-4.5525	WALB																												536.063	-0.0345931	-0.00295503	0.197768	0.488322	43
WALB25	2009	36.5445	-4.5525	WALB																												523.279	-0.0267935	0.0087676	0.281884	0.655013	47
WALB26	2009	36.5445	-4.5525	WALB																												621.919	-0.0334576	-0.0146971	0.210014	0.321354	47
WALB27	2009	36.5445	-4.5525	WALB			0.2667	0.7626	0.577	140	144	311	311	246	258	119	125	118	121	165	177	260	260	148	148	274	277	299	313	150	155	526.09	0.0183396	0.00839063	0.768628	0.649652	43
WALB28	2009	36.5445	-4.5525	WALB	Ldep_01	0.9947	0.4032	0.657	0.5302	140	144	311	311	258	258	116	122	118	124	175	175	256	259	148	148	274	274	280	312	149	150	455.365	0.0259191	0.0223849	0.850371	0.848645	44
WALB29	2009	36.5445	-4.5525	WALB			0.286	0.7333	0.5306	135	144	269	311	252	266	113	119	118	139	153	173	260	261	148	148	274	274	297	297	149	150	536.165	0.0236594	-0.00881401	0.826	0.40501	53
WALB30	2009	36.5445	-4.5525	WALB	Ldep_02	0.0108	0.5	0.6825	0.7807	140	144	311	311	243	255	110	113	115	115	175	175	261	264	148	148	274	277	284	284	155	155	632.129	-0.0247514	0.00046138	0.303907	0.536902	52
WALB31	2009	36.5445	-4.5525	WALB	Ldep_03	0.9923	0.3887	0.7	0.7637	140	156	311	311	249	255	119	125	118	118	177	177	259	272	148	151	274	277	291	294	149	155	665.094	0.0200185	-0.0243218	0.786735	0.184495	48
WALB32	2009	36.5445	-4.5525	WALB			0.2799	0.7012	0.5312	140	140	311	314	254	254	113	119	115	120	0	0	261	264	148	148	274	274	296	296	150	149	373.859	-0.00294181	0.018177	0.539116	0.788811	44
WALB33	2009	36.5445	-4.5525	WALB			0.3952	0.7367	0.764	144	152	311	314	239	270	113	119	118	121	165	167	261	267	148	148	0	0	0	0	149	155	552.999	0.0310937	0.00139749	0.906177	0.550213	49
WALB34	2009	36.5445	-4.5525	WALB																												622.015	-0.0223467	-0.00394933	0.329841	0.474183	37
WALB35	2009	36.5445	-4.5525	WALB																												588.366	-0.0410293	-0.00109121	0.128356	0.514825	45
WALB36	2009	36.5445	-4.5525	WALB																												529.589	0.0171852	0.00156009	0.756179	0.552525	32
WALB37	2009	36.5445	-4.5525	WALB			0.3988	0.6733	0.7398	140	140	311	311	249	258	113	122	118	118	175	175	260	261	148	148	274	277	279	279	149	149	640.412	-0.0312984	-0.0102801	0.2333	0.384162	42
WALB38	2009	36.5445	-4.5525	WALB			0.3363	0.711	0.577	148	152	304	311	246	264	119	125	118	179	175	177	259	261	148	148	274	274	295	317	150	155	626.651	0.00140541	-0.00749862	0.585999	0.423714	46
WALB39	2009	36.5445	-4.5525	WALB	Ldep_54	0.9955	0.3057	0.7602	0.7639	144	158	311	311	239	258	116	122	118	142	171	173	260	261	148	148	274	274	279	308	149	155	610.633	-0.00921187	-0.00882548	0.471496	0.404846	50
WALB40	2009	36.5445	-4.5525	WALB	Ldep_02	0.0106	0.3725	0.6981	0.5307	144	144	311	311	239	252	116	119	108	118	175	175	259	264	148	148	274	274	286	306	149	150	422.324	-0.015216	-0.00288808	0.406744	0.489274	53
WALB41	2009	36.5445	-4.5525	WALB	Ldep_03	0.9926	0.2337	0.799	0.7639	140	152	311	311	249	255	119	122	118	142	183	184	260	260	148	154	274	277	349	301	149	155	667.288	-0.0314587	-0.0154372	0.231572	0.31083	43
WALB42	2009	36.5445	-4.5525	WALB	Ldep_03	0.9926	0.3577	0.7233	0.7809	148	148	311	311	264	279	119	122	118	124	171	181	264	266	148	154	277	277	283	329	155	155
WALB43	2009	36.5445	-4.5525	WALB	Ldep_27	0.9947	0.3029	0.736	0.7399	135	135	311	311	255	258	122	122	118	124	150	179	260	261	148	148	277	277	297	297	149	149	621.07	0.00330302	-0.0102306	0.606464	0.384866	41
WALB44	2009	36.5445	-4.5525	WALB	Ldep_03	0.9927	0.2505	0.7574	0.5307	144	168	311	311	243	255	119	125	120	174	175	177	259	264	148	148	274	274	278	299	149	150	659.752	-0.0265456	-0.00592866	0.284558	0.446038	49
WALB45	2009	36.5445	-4.5525	WALB																												603.827	-0.00526758	-0.0221577	0.514033	0.215268	49
WALB46	2009	36.5445	-4.5525	WALB																												477.867	0.0007548	0.00138942	0.578983	0.550098	41
WALB47	2009	36.5445	-4.5525	WALB	Ldep_02	0.0108	0.3664	0.6699	0.5307	127	190	311	311	246	261	113	122	118	118	173	175	261	266	148	148	274	277	291	304	149	150	528.854	-0.0158898	0.00913	0.399477	0.660166	40
WALB48	2009	36.5445	-4.5525	WALB	Ldep_08	0.9947	0.4575	0.6721	0.7787	148	156	311	311	258	260	119	122	118	118	175	177	260	261	148	148	274	277	302	308	152	155
WALB49	2009	36.5445	-4.5525	WALB	Ldep_02	0.0109	0.301	0.6852	0.5775	148	154	311	311	239	258	122	125	118	121	175	175	264	264	148	148	274	274	283	296	150	155	570.734	0.0142911	-0.0158851	0.724967	0.304462	47
WALB50	2009	36.5445	-4.5525	WALB	Ldep_02	0.0108	0.387	0.6896	0.7396	144	152	269	269	258	258	107	119	118	124	175	181	259	261	148	148	274	274	310	310	149	149	683.747	-0.0105685	0.0201382	0.456865	0.816698	48
WALB51	2009	36.5753	-4.2415	WALB																												543.135	0.0033774	0.0152297	0.607267	0.746902	42
WALB52	2011	36.2905	-5.05617	WALB																												534.021	-0.0227111	0.00592758	0.325911	0.614629	41
WALB53	2011	36.5922	-4.446	WALB																												555.736	-0.00113557	-0.00407638	0.558596	0.472377	43
WALB54	2011	36.5922	-4.446	WALB																												526.288	0.0197655	-0.0133899	0.784006	0.339943	41
WALB55	2011	36.5922	-4.446	WALB																												596.393	-0.0142544	0.000982254	0.417114	0.544308	46
WALB56	2011	36.5922	-4.446	WALB																												553.434	0.00909924	-0.00980886	0.668975	0.390863	43
WALB57	2011	36.5922	-4.446	WALB																												568.722	0.0291635	0.00898407	0.885361	0.658091	45
WALB58	2011	36.5922	-4.446	WALB																												570.668	-0.00902069	0.00998508	0.473558	0.672325	44
WALB59	2011	36.5922	-4.446	WALB																												577.383	0.00858863	-0.00422035	0.663468	0.47033	44
EALB01	2009	36.7118	-2.59317	EALB																												387.503	0.01068	0.0268016	0.686023	0.911448	40
EALB02	2009	36.7118	-2.59317	EALB																												637.335	-0.024287	-0.00664965	0.308915	0.435786	40
EALB03	2009	36.7118	-2.59317	EALB																												507.682	0.0281219	0.0104113	0.874127	0.678386	49
EALB04	2009	36.7118	-2.59317	EALB																												600.747	-0.0260544	0.00105053	0.289855	0.545279	49
EALB05	2009	36.7118	-2.59317	EALB																												513.358	-0.00103709	-0.00445932	0.559658	0.466932	46
EALB06	2009	36.7118	-2.59317	EALB																												636.11	-0.0191783	-0.00172057	0.364012	0.505875	46
EALB07	2009	36.7118	-2.59317	EALB																												629.978	-0.00375092	-0.00487198	0.53039	0.461064	49
EALB08	2009	36.7118	-2.59317	EALB																												607.158	0.0262315	-0.0051632	0.85374	0.456923	30
EALB09	2009	36.7118	-2.59317	EALB																												582.115	0.010203	0.0111148	0.680878	0.688389	45
EALB10	2009	36.7118	-2.59317	EALB																												585.243	-0.031507	0.00305868	0.23105	0.573834	50
EALB11	2009	36.7118	-2.59317	EALB																												580.309	0.0239414	0.00889914	0.829042	0.656883	48
EALB12	2009	36.7118	-2.59317	EALB																												652.285	-0.0162576	0.00408096	0.39551	0.588371	46
EALB13	2009	36.7118	-2.59317	EALB																												569.635	0.0285353	-0.00272969	0.878585	0.491526	45
EALB14	2009	36.716	-2.53433	EALB																												605.23	0.0192593	0.00565037	0.778547	0.610687	49
EALB15	2009	36.716	-2.53433	EALB																												624.633	0.00934424	0.0128091	0.671617	0.712481	48
EALB16	2009	36.716	-2.53433	EALB																												614.086	-0.0278693	0.00426232	0.270282	0.590949	47
EALB17	2009	36.5827	-2.49133	EALB																												665.41	0.0214648	0.0134486	0.802332	0.721575	53
EALB18	2009	36.7185	-2.2825	EALB																												489.571	-0.000448228	-0.012106	0.566009	0.358199	38
EALB19	2011	36.647	-3.0795	EALB																												601.273	-0.0400944	-0.0152799	0.138438	0.313067	47
EALB20	2011	36.647	-3.0795	EALB																												580.834	-0.0054993	-0.0183304	0.511534	0.269691	47
EALB21	2011	36.647	-3.0795	EALB																												617.576	0.0182324	-0.00669517	0.767473	0.435139	49
EALB22	2011	36.7163	-3.32	EALB																												575.024	-0.0242147	-0.00244425	0.309695	0.495585	44
EALB23	2011	36.7163	-3.32	EALB																												602.559	-0.00404955	-0.0109081	0.527169	0.375232	48
EALB24	2011	36.7163	-3.32	EALB																												561.24	0.0189884	-0.016969	0.775625	0.289049	44
EALB25	2011	36.7163	-3.32	EALB																												554.189	-0.0182077	-0.0162116	0.374479	0.299819	42
EALB26	2011	36.7163	-3.32	EALB																												601.215	-0.00166481	0.00371648	0.552888	0.583188	48
EALB27	2011	36.7163	-3.32	EALB																												540.398	0.0268062	-0.014096	0.859938	0.329902	43
EALB28	2011	36.7163	-3.32	EALB																												544.259	-0.0196095	0.00771155	0.359361	0.639996	42
EALB29	2011	36.7163	-3.32	EALB																												575.797	0.00297074	0.0159066	0.602881	0.756526	45
EALB31	2011	36.7163	-3.32	EALB																												574.271	-0.0236012	0.0115538	0.316312	0.694631	44
ALAC01	2009	38.2675	-0.24	ALAC	Ldep_55	0.0038	0.1386	0.6692	0.2609	144	152	311	311	252	252	119	122	115	118	185	185	259	259	148	148	274	277	294	324	149	153	626.596	0.0148925	0.000947992	0.731453	0.543821	53
ALAC02	2009	38.2675	-0.24	ALAC	Ldep_02	0.003	0.1264	0.6532	0.1516	164	181	311	311	252	273	119	119	118	123	171	175	259	264	148	148	274	274	298	307	150	150	540.711	-0.0189708	0.00752516	0.366249	0.637346	47
ALAC03	2009	38.2675	-0.24	ALAC	Ldep_02	0.0029	0.1287	0.6535	0.1517	135	173	311	311	252	261	119	125	118	118	150	175	259	261	148	148	274	274	297	317	150	150	438.05	0.0132908	0.0213693	0.714179	0.834203	42
ALAC04	2009	38.2675	-0.24	ALAC	Ldep_02	0.0028	0.3092	0.5652	0.5102	131	140	309	311	258	258	122	122	118	118	173	177	259	261	148	148	274	274	350	304	149	155	638.685	-0.000393348	-0.0118199	0.5666	0.362267	49
ALAC05	2009	38.2675	-0.24	ALAC	Ldep_56	0.0062	0.1291	0.7064	0.1518	148	154	311	314	258	279	119	122	112	121	175	177	261	261	148	148	274	274	275	299	150	150	658.274	0.0219563	-0.0225462	0.807633	0.209744	47
ALAC06	2009	38.2675	-0.24	ALAC	Ldep_02	0.0029	0.1449	0.7055	0.2343	144	160	269	314	252	261	110	122	118	124	181	181	259	262	148	148	274	277	278	302	150	149	659.922	0.0268511	0.00216706	0.860422	0.561156	34
ALAC07	2009	38.2675	-0.24	ALAC	Ldep_02	0.003	0.1814	0.5346	0.1518	135	148	314	314	264	275	119	119	110	118	167	175	258	264	148	148	274	274	300	317	150	150	614.429	-0.026156	-0.0116337	0.288759	0.364915	53
ALAC08	2009	38.2675	-0.24	ALAC	Ldep_02	0.0028	0.2631	0.516	0.234	135	148	311	311	252	270	119	122	110	118	175	181	258	264	148	148	274	274	302	315	150	149	618.265	-0.0292544	-0.0102499	0.255344	0.384592	49
ALAC09	2009	38.2675	-0.24	ALAC	Ldep_02	0.0029	0.3369	0.6306	0.5106	144	148	311	311	246	249	119	122	118	139	171	177	256	265	148	148	274	277	278	310	149	155	592.578	0.00565849	0.00348321	0.631867	0.579871	46
ALAC10	2009	38.2675	-0.24	ALAC	Ldep_02	0.003	0.222	0.5421	0.3177	135	144	311	311	246	264	113	116	118	121	175	179	262	262	148	148	274	274	358	304	150	155	572.104	0.00457698	0.00185644	0.620204	0.556739	45
ALAC11	2009	38.2675	-0.24	ALAC	Ldep_02	0.003	0.1987	0.6231	0.4252	131	135	269	311	252	264	119	119	118	118	153	177	254	258	148	148	274	274	299	299	149	149	601.615	-0.00538534	-0.00351435	0.512763	0.480369	46
ALAC12	2009	38.6322	0.2705	ALAC	Ldep_02	0.0028	0.1175	0.709	0.2337	152	160	311	311	246	252	113	122	118	174	175	185	259	261	148	148	277	277	303	320	150	149	631.285	0.0242176	-0.00853967	0.83202	0.408911	50
ALAC13	2009	38.6322	0.2705	ALAC	Ldep_57	0.0211	0.1583	0.659	0.2337	131	140	311	311	258	261	119	131	108	120	173	175	259	261	148	148	274	277	284	319	150	149	608.88	-0.0260014	-0.0141943	0.290427	0.328504	44
ALAC14	2009	38.6322	0.2705	ALAC	Ldep_03	0.9275	0.1943	0.626	0.234	135	144	311	311	249	252	110	122	118	118	153	153	258	259	148	151	274	274	309	349	150	149	632.709	0.00156668	-0.0105415	0.587739	0.380446	46
ALAC15	2009	38.6322	0.2705	ALAC	Ldep_02	0.0028	0.1845	0.6214	0.2338	131	152	311	311	243	243	125	125	118	118	175	175	261	261	148	148	274	274	295	331	150	149	562.716	0.00752165	-0.00773972	0.651961	0.420286	52
ALAC16	2009	38.6322	0.2705	ALAC	Ldep_02	0.0029	0.2077	0.5476	0.2873	164	164	311	311	255	261	116	119	118	121	175	175	261	266	148	148	274	277	338	322	147	149	570.096	-0.0145086	0.00478274	0.414372	0.59835	48
ALAC17	2009	38.6322	0.2705	ALAC	Ldep_58	0.0165	0.2247	0.6351	0.234	156	168	311	311	243	249	119	122	118	118	173	173	259	261	145	148	274	274	291	299	149	150	625.237	-0.00708674	-0.00576322	0.494414	0.448391	49
ALAC18	2009	38.6322	0.2705	ALAC	Ldep_02	0.0029	0.1651	0.7335	0.3177	148	154	311	311	261	263	122	125	118	118	169	169	261	264	148	148	274	277	299	347	150	155	626.034	0.0180244	-0.0106498	0.765229	0.378906	44
ALAC19	2009	38.6322	0.2705	ALAC	Ldep_02	0.0028	0.2378	0.598	0.4244	144	148	311	311	258	258	116	119	115	118	171	175	259	261	148	148	274	274	306	314	149	149	685.465	-0.0183601	-0.0060323	0.372836	0.444564	50
ALAC20	2009	38.6322	0.2705	ALAC	Ldep_02	0.0029	0.1807	0.5813	0.1517	148	193	311	311	243	270	119	119	118	118	179	179	262	267	148	148	274	274	295	306	150	150	593.004	-0.00167113	-0.00399234	0.55282	0.473572	50
ALAC21	2009	38.6322	0.2705	ALAC	Ldep_02	0.0029	0.2277	0.5842	0.3182	140	160	311	311	258	266	119	119	118	118	171	175	260	262	148	148	274	274	284	324	150	155	620.618	-0.0278471	0.00671262	0.270522	0.625792	50
ALAC22	2009	38.6322	0.2705	ALAC	Ldep_02	0.0028	0.2137	0.613	0.4248	113	135	311	311	249	252	116	122	118	174	175	175	259	261	148	148	274	277	304	305	149	149	635.608	0.00193094	-0.0090353	0.591667	0.401863	46
ALAC23	2009	38.2925	-0.380667	ALAC	Ldep_59	0.9395	0.1342	0.7019	0.1519	133	181	309	311	249	264	116	119	118	118	179	183	261	261	139	148	274	274	297	299	150	150	576.613	0.0039684	-0.00584407	0.61364	0.447241	45
ALAC24	2009	38.2925	-0.380667	ALAC	Ldep_02	0.0028	0.167	0.5716	0.1518	140	156	311	311	252	261	113	119	110	120	173	181	261	266	148	148	274	277	306	309	150	150	548.789	-0.0275027	-0.00680877	0.274235	0.433523	43
ALAC25	2009	38.2925	-0.380667	ALAC	Ldep_02	0.0029	0.1128	0.7092	0.1514	127	144	269	311	255	258	119	122	118	118	150	175	265	265	148	148	277	277	330	302	150	150	401.814	0.0208041	0.00632065	0.795207	0.620218	31
ALAC26	2009	38.2925	-0.380667	ALAC	Ldep_02	0.0029	0.1699	0.6469	0.4253	135	135	311	311	252	258	119	119	118	121	175	175	258	265	148	160	274	274	330	364	149	149	571.481	0.0274654	-0.00495021	0.867047	0.459951	46
ALAC27	2009	38.2925	-0.380667	ALAC	Ldep_19	0.0023	0.2359	0.4324	0.1517	118	127	311	311	252	261	119	119	118	120	175	175	258	264	148	148	274	274	295	298	150	150	601.462	-0.0175689	-5.53891e-05	0.381369	0.529554	45
ALAC28	2009	38.6617	0.394833	ALAC	Ldep_02	0.0029	0.2806	0.5084	0.4255	144	148	311	311	258	258	119	122	118	174	179	179	258	264	148	148	274	277	310	316	149	149	456.562	0.00187081	0.0100179	0.591018	0.672792	47
ALAC29	2009	38.6617	0.394833	ALAC	Ldep_55	0.004	0.1921	0.5397	0.1515	152	156	311	311	243	255	119	122	118	118	165	177	259	261	148	148	274	274	308	312	150	150	597.832	-0.052931	-0.0142353	0	0.327921	36
ALAC30	2009	38.6617	0.394833	ALAC	Ldep_02	0.0028	0.1523	0.6107	0.1579	140	148	311	314	239	252	113	116	118	118	173	189	259	261	148	148	277	277	312	316	150	156	493.713	0.00754753	0.0119407	0.65224	0.700133	34
ALAC31	2009	38.6617	0.394833	ALAC	Ldep_60	0.0047	0.1851	0.4498	0.1598	148	164	311	311	252	255	119	122	118	118	165	175	262	264	148	148	274	274	310	314	150	153	443.236	0.0143045	0.0168645	0.725112	0.770147	38
ALAC32	2009	38.069	-0.0368333	ALAC	Ldep_02	0.0031	0.1571	0.7183	0.2503	144	190	311	314	255	258	119	122	112	118	158	177	259	261	148	154	277	277	355	312	149	156	433.484	0.0257068	0.0199557	0.848082	0.814103	35
ALAC33	2009	38.069	-0.0368333	ALAC																												497.192	-0.0015479	-0.00944755	0.554149	0.396001	40
ALAC34	2009	38.1648	-0.160167	ALAC																												436.792	0.020139	0.00830925	0.788035	0.648495	36
ALAC36	2009	38.5277	0.00766667	ALAC																												635.378	-0.0255305	-0.0123621	0.295505	0.354558	50
ALAC37	2009	38.4477	0.463333	ALAC																												665.153	-0.00199698	-0.000926871	0.549306	0.517161	42
ALAC38	2009	38.5738	0.495	ALAC																												501.197	-0.00953049	-0.000233062	0.468059	0.527027	33
ALAC40	2009	37.6248	-0.660333	ALAC																												592.256	0.0057079	0.00304791	0.6324	0.573681	48
VALE01	2009	38.8707	0.3428	VALE			0.0282	0.6703	0.0643	135	152	311	311	255	264	119	119	118	121	171	175	259	259	148	148	274	274	303	320	150	150	590.77	-0.0212339	0.00301221	0.341842	0.573173	46
VALE02	2009	39.13	0.206333	VALE	Ldep_61	0.012	0.0446	0.6429	0.2026	135	135	311	311	258	258	116	119	118	118	175	175	260	267	148	148	277	277	294	300	149	149	508.449	0.0185198	0.00761857	0.770572	0.638674	40
VALE03	2009	39.3677	-0.0926667	VALE	Ldep_62	0.9102	0.0266	0.7838	0.0644	127	144	311	311	243	264	119	125	118	124	177	177	260	261	148	148	0	0	282	292	150	150
VALE04	2009	38.9882	0.191667	VALE	Ldep_02	0.0081	0.0455	0.7064	0.1788	140	181	311	311	264	264	119	119	118	174	153	175	260	260	148	148	274	277	330	310	150	155	521.653	0.0331264	-0.00586817	0.928099	0.446898	41
VALE05	2010	39.13	0.206333	VALE	Ldep_02	0.0079	0.0284	0.7125	0.0644	144	156	0	0	0	0	119	122	118	118	163	175	260	261	148	148	0	0	0	0	150	150	444.108	0.00889223	0.0127781	0.666742	0.712041	35
VALE06	2010	39.13	0.206333	VALE	Ldep_06	0.8962	0.0247	0.8108	0.1789	156	160	269	311	252	261	119	137	118	132	163	177	259	259	148	154	274	277	275	312	150	155
VALE07	2010	39.13	0.206333	VALE	Ldep_63	0.0369	0.0427	0.6816	0.1031	131	152	311	311	243	255	119	119	118	174	173	177	259	259	148	148	274	274	294	309	150	149
VALE08	2010	39.13	0.206333	VALE	Ldep_02	0.0077	0.0237	0.7307	0.0671	148	152	311	311	239	261	119	122	121	172	175	177	259	262	148	148	274	277	301	322	150	153	435.52	0.0292957	0.00435882	0.886786	0.592322	34
VALE09	2010	39.13	0.206333	VALE	Ldep_02	0.0079	0.0352	0.6412	0.1033	148	148	269	311	252	264	113	119	118	118	178	179	264	264	148	148	274	277	308	314	149	150	531.531	0.0187398	0.00032851	0.772945	0.535012	42
VALE10	2010	39.13	0.206333	VALE			0.0249	0.7955	0.0644	140	144	311	311	255	258	110	119	118	118	177	185	261	261	145	148	271	271	318	337	150	150	413.31	-0.00155601	-0.000906387	0.554061	0.517453	32
VALE11	2010	39.13	0.206333	VALE	Ldep_03	0.9759	0.0573	0.6095	0.1033	152	152	311	311	252	252	113	119	112	118	173	175	261	261	148	148	277	277	295	310	149	150
VALE12	2010	39.13	0.206333	VALE	Ldep_03	0.9755	0.0277	0.7719	0.1033	144	181	311	311	252	261	119	122	118	118	177	177	261	268	148	148	274	277	321	321	149	150	573.08	0.035845	-0.00973788	0.957418	0.391873	46
VALE13	2010	39.13	0.206333	VALE	Ldep_02	0.0078	0.0307	0.6895	0.0644	144	152	309	311	243	255	119	119	118	118	175	179	264	266	148	148	274	274	275	321	150	150	452.614	0.0194524	-0.00935113	0.78063	0.397372	36
VALE14	2010	39.13	0.206333	VALE	Ldep_19	0.006	0.0372	0.6027	0.0645	131	131	311	311	252	264	119	125	118	121	165	175	259	266	148	151	277	277	304	314	150	150
VALE15	2010	39.13	0.206333	VALE	Ldep_02	0.0078	0.0277	0.6752	0.0643	144	144	311	311	255	258	119	125	118	121	153	163	260	266	148	148	274	274	300	314	150	150
VALE16	2010	39.13	0.206333	VALE	Ldep_02	0.0078	0.0379	0.6014	0.0643	135	164	311	311	255	264	119	122	118	118	175	175	259	261	148	148	274	274	283	304	150	150	394.42	0.00954393	0.0172112	0.67377	0.775077	31
VALE17	2010	39.13	0.206333	VALE			0.0399	0.6954	0.1032	135	140	311	311	255	264	113	122	118	118	173	177	260	266	148	154	274	274	285	350	150	149
VALE18	2010	39.13	0.206333	VALE			0.0356	0.7362	0.1786	133	140	311	311	261	266	113	122	118	174	173	181	260	264	148	148	274	274	308	314	150	155	585.174	-0.0124729	0.0152708	0.436327	0.747486	45
VALE19	2010	39.13	0.206333	VALE	Ldep_64	0.9798	0.0233	0.7459	0.1033	152	164	311	311	261	267	122	122	118	118	175	175	260	260	148	154	277	277	295	301	150	149
VALE20	2010	39.13	0.206333	VALE	Ldep_02	0.0077	0.0314	0.7044	0.0647	122	140	311	311	255	258	122	125	118	174	165	165	260	267	148	148	274	277	304	314	150	150	600.101	-0.0178552	0.00520311	0.37828	0.604327	30
VALE21	2010	39.13	0.206333	VALE	Ldep_19	0.006	0.027	0.7361	0.1034	135	148	311	311	252	255	116	119	118	118	168	179	259	259	148	148	271	274	307	316	150	149	595.842	-0.019781	0.00287217	0.357511	0.571182	47
VALE22	2010	39.13	0.206333	VALE	Ldep_02	0.0079	0.0363	0.7421	0.1033	140	148	269	311	276	276	119	119	112	115	175	175	259	264	148	148	274	274	291	306	150	149
VALE23	2010	39.13	0.206333	VALE	Ldep_02	0.0077	0.0401	0.7357	0.179	144	152	311	311	243	246	119	122	118	118	179	181	267	267	148	148	274	277	299	304	150	155	525.433	0.0377815	-0.000617604	0.978303	0.521559	42
VALE24	2010	39.13	0.206333	VALE	Ldep_19	0.0059	0.0261	0.7155	0.0672	152	156	311	311	252	255	113	113	118	139	171	175	260	260	148	148	274	274	296	301	150	153	379.517	0.0264717	-0.00889456	0.856331	0.403864	30
VALE25	2010	39.13	0.206333	VALE	Ldep_01	0.9825	0.0261	0.7346	0.0646	148	160	311	311	249	264	113	122	118	174	177	177	264	264	148	148	277	277	293	299	150	150
VALE26	2010	39.13	0.206333	VALE	Ldep_02	0.0077	0.0326	0.7012	0.0643	144	156	311	311	246	252	113	119	112	118	175	181	259	261	148	148	274	274	302	320	150	150
VALE27	2010	39.13	0.206333	VALE	Ldep_02	0.0077	0.0237	0.798	0.0643	127	164	311	314	267	275	113	119	112	121	165	188	261	266	148	148	274	277	318	330	150	150	624.727	0.00220247	-0.0174761	0.594595	0.281838	48
VALE28	2010	39.13	0.206333	VALE	Ldep_02	0.008	0.0252	0.7266	0.0644	131	152	311	311	254	264	119	128	118	118	175	177	256	260	148	148	274	274	283	294	150	150	568.834	0.0252311	-0.00528551	0.842951	0.455183	46
VALE29	2010	39.13	0.206333	VALE	Ldep_03	0.9754	0.03	0.6851	0.0644	164	185	311	311	252	261	119	125	118	118	175	175	259	264	148	148	277	277	297	302	150	150
VALE30	2010	39.13	0.206333	VALE			0.0331	0.7906	0.1032	142	210	311	311	239	270	113	119	110	118	153	177	259	265	148	154	277	277	291	304	149	150	388.81	-0.00367146	0.00446137	0.531247	0.59378	30
VALE31	2010	39.13	0.206333	VALE	Ldep_03	0.9752	0.0355	0.7177	0.1031	144	160	311	311	255	264	113	122	118	118	171	181	260	266	148	157	274	274	296	337	149	150	585.373	0.0185718	0.00590521	0.771133	0.614311	47
VALE32	2010	39.13	0.206333	VALE			0.0323	0.7762	0.1032	122	127	311	311	258	267	116	131	108	118	171	173	262	264	148	148	274	274	358	348	150	149
VALE33	2010	39.5892	-0.00783333	VALE																												435.799	-0.02895	0.00704075	0.258626	0.630458	34
VALE34	2010	39.5892	-0.00783333	VALE																												401.678	0.00160362	-0.000908463	0.588137	0.517423	31
VALE35	2010	39.5892	-0.00783333	VALE																												407.942	-0.00192322	0.0219689	0.550101	0.842729	32
VALE36	2010	39.3847	-0.100333	VALE																												442.778	0.00426993	8.08837e-06	0.616892	0.530456	35
VALE37	2010	39.3847	-0.100333	VALE																												558.195	0.0143058	0.00362814	0.725126	0.581932	44
VALE38	2010	39.3847	-0.100333	VALE																												462.384	0.0213831	-0.0114528	0.801452	0.367487	36
VALE39	2010	39.3847	-0.100333	VALE																												429.635	-0.0269146	0.00689648	0.280578	0.628406	33
VALE40	2010	39.3847	-0.100333	VALE																												464.113	-0.0187232	-0.0134458	0.368919	0.339147	36
VALE41	2010	39.3847	-0.100333	VALE																												547.719	0.0160869	-0.0188663	0.744334	0.26207	44
VALE42	2010	39.3847	-0.100333	VALE																												461.221	0.0190096	-0.0178148	0.775854	0.277023	37
VALE43	2010	39.3847	-0.100333	VALE																												473.206	-0.00389171	0.0024877	0.528872	0.565715	37
VALE44	2010	39.3847	-0.100333	VALE																												445.171	9.59122e-05	-0.00326261	0.571877	0.483948	34
VALE45	2010	39.3847	-0.100333	VALE																												429.199	-0.0125492	0.0103535	0.435504	0.677563	33
VALE53	2010	39.6148	-0.0963333	VALE																												564.203	-0.0163603	-0.00393652	0.394403	0.474366	42
VALE54	2010	39.6148	-0.0963333	VALE																												536.583	0.0144093	0.0141161	0.726242	0.731066	44
VALE56	2010	38.822	0.271	VALE																												595.015	-0.0195215	-0.00193106	0.36031	0.502882	41
VALE57	2010	38.9028	0.215667	VALE																												579.336	0.00651963	-0.00217969	0.641154	0.499347	45
VALE58	2010	38.9418	0.139667	VALE																												579.962	0.0274956	-0.00293094	0.867373	0.488664	46
VALE59	2010	38.9418	0.139667	VALE																												560.37	-0.0371894	-0.0136975	0.169768	0.335568	43
VALE60	2010	39.1313	0.2045	VALE																												538.292	-0.00385178	-0.0156629	0.529302	0.307621	42
DELT01	2009	39.8735	0.322167	DELT																												578.711	-0.0300788	-0.00626302	0.246454	0.441284	45
DELT02	2009	39.8735	0.322167	DELT																												576.475	-0.0351442	-0.0128525	0.191825	0.347584	47
DELT03	2009	39.8735	0.322167	DELT																												570.485	0.0118579	0.00661575	0.698726	0.624414	49
DELT04	2009	39.8735	0.322167	DELT																												609.665	0.0217499	-0.00737556	0.805407	0.425464	41
DELT05	2009	39.8735	0.322167	DELT	Ldep_02	0.0041	0.0328	0.6737	0.0232	135	144	311	311	255	255	110	110	118	118	177	179	259	261	138	148	274	277	295	312	150	150	594.891	0.00232391	-0.0100121	0.595905	0.387973	44
DELT06	2009	39.8735	0.322167	DELT																												578.546	-7.77631e-05	-0.00271904	0.570004	0.491678	45
DELT07	2009	39.8735	0.322167	DELT	Ldep_02	0.0037	0.0232	0.7172	0.0235	135	158	311	311	252	255	119	125	118	118	165	181	259	259	148	154	274	274	308	330	150	150	515.451	0.0195605	0.00150479	0.781796	0.551739	45
DELT08	2009	39.8735	0.322167	DELT	Ldep_01	0.9711	0.0209	0.7288	0.0234	135	152	311	311	252	279	119	131	118	121	177	184	259	262	148	148	267	277	295	310	150	150	520.378	-0.0239611	0.00503735	0.31243	0.60197	44
DELT09	2009	39.8735	0.322167	DELT	Ldep_02	0.004	0.0255	0.6903	0.0234	144	148	311	311	255	261	119	122	118	120	175	175	261	264	148	148	267	277	319	319	150	150	561.057	0.0179103	-0.0085994	0.763999	0.408061	40
DELT10	2009	40.3285	0.962833	DELT	Ldep_02	0.0041	0.032	0.7424	0.0235	148	176	311	314	258	270	119	125	118	118	175	175	260	260	148	151	274	274	325	325	149	150	586.445	-0.0211154	0.00144881	0.34312	0.550943	46
DELT11	2009	40.3285	0.962833	DELT	Ldep_02	0.0039	0.0287	0.6917	0.0234	135	140	311	311	258	261	119	125	118	121	177	179	259	266	148	148	274	274	278	282	150	150	629.133	-0.0284071	-0.0122522	0.264482	0.35612	48
DELT12	2009	40.3285	0.962833	DELT	Ldep_02	0.0041	0.039	0.7012	0.0235	135	160	269	311	255	261	116	119	118	118	153	177	262	266	148	154	274	277	297	326	149	149	654.882	0.0204953	-0.00838775	0.791877	0.411071	45
DELT13	2009	40.3285	0.962833	DELT	Ldep_02	0.004	0.0249	0.7198	0.1093	144	156	269	314	252	255	116	122	118	118	171	177	260	264	148	148	274	277	297	349	150	150	540.264	-0.00173772	-0.0011768	0.552102	0.513608	49
DELT14	2009	40.3285	0.962833	DELT	Ldep_02	0.0041	0.0364	0.6343	0.047	135	156	311	311	257	258	113	122	118	118	173	177	262	262	148	151	274	274	294	348	150	150
DELT15	2009	40.3285	0.962833	DELT	Ldep_02	0.0039																										611.48	-0.0103575	-0.0172911	0.45914	0.284469	47
DELT16	2009	40.3285	0.962833	DELT	Ldep_02	0.0041	0.0223	0.7508	0.0232	135	140	311	311	263	267	110	119	118	118	177	177	260	264	148	148	274	274	299	301	150	150	538.238	-0.0166304	0.00858932	0.39149	0.652478	42
DELT17	2009	40.3285	0.962833	DELT	Ldep_02	0.004	0.0518	0.6051	0.0233	160	160	311	311	254	264	119	122	118	118	175	175	261	264	148	148	274	274	296	323	150	150	533.267	0.024862	-0.00221621	0.838971	0.498827	42
DELT18	2009	40.3285	0.962833	DELT	Ldep_02	0.0041	0.063	0.4947	0.1679	144	164	311	311	255	258	119	119	118	121	175	177	262	262	148	148	274	274	294	294	150	150	707.82	0.00184117	-0.022527	0.590699	0.210016	52
DELT19	2009	40.3285	0.962833	DELT	Ldep_02	0.0041	0.0254	0.7191	0.0497	138	144	311	314	258	258	119	119	118	118	173	177	259	264	148	154	274	277	306	317	150	150	575.051	0.0131044	-0.0136159	0.712169	0.336729	56
DELT20	2009	40.0207	0.878333	DELT	Ldep_02	0.0041	0.0237	0.6878	0.0472	135	135	269	311	254	255	119	119	118	118	181	189	259	264	148	148	274	277	295	316	150	150	510.573	0.0197596	-0.00119714	0.783943	0.513318	40
DELT21	2009	40.0207	0.878333	DELT	Ldep_02	0.004	0.029	0.8139	0.0233	173	176	311	311	243	261	110	119	108	118	171	171	259	268	148	151	273	273	306	306	141	149	546.528	-0.00280704	-0.00738652	0.54057	0.425308	33
DELT22	2009	40.0207	0.878333	DELT	Ldep_02	0.004	0.0503	0.6019	0.0255	140	140	311	311	252	264	119	125	118	120	175	175	259	259	148	148	274	274	277	310	150	149	500.63	0.00783865	-0.00264225	0.65538	0.492769	40
DELT23	2009	40.0207	0.878333	DELT	Ldep_02	0.0039	0.0266	0.7283	0.0233	140	202	311	311	255	263	119	122	118	118	175	177	260	266	148	148	274	274	282	335	150	150	517.371	-0.0284965	0.00487004	0.263518	0.599591	40
DELT24	2009	40.0207	0.878333	DELT	Ldep_02	0.004	0.0337	0.7179	0.0234	127	127	311	311	255	267	113	122	118	124	175	175	265	267	148	148	277	277	308	311	150	150	422.457	-0.0111861	0.0157674	0.450204	0.754547	40
DELT25	2009	40.0207	0.878333	DELT			0.0643	0.6503	0.0471	135	158	311	311	252	255	113	125	118	118	175	175	266	268	148	148	277	277	308	311	149	149	546.515	-0.0345845	0.0167718	0.197861	0.768829	42
DELT26	2009	40.0207	0.878333	DELT	Ldep_03	0.9588	0.0268	0.7062	0.0232	135	140	311	311	264	276	119	119	118	120	175	185	260	267	151	151	274	274	295	296	144	149	498.987	0.0269262	-0.00380062	0.861232	0.476298	42
DELT27	2009	39.8898	0.474167	DELT	Ldep_02	0.004	0.0444	0.7122	0.1686	122	135	269	311	246	255	113	131	118	118	177	177	261	266	148	148	274	274	322	326	150	149	508.32	0.0226691	-0.00958106	0.81532	0.394102	45
DELT28	2009	39.8898	0.474167	DELT	Ldep_02	0.0039	0.029	0.6865	0.0234	122	148	269	311	252	255	113	122	118	139	173	185	259	264	148	148	274	274	297	317	150	150	561.831	0.0233074	-0.00328789	0.822205	0.483589	46
DELT29	2009	39.8898	0.474167	DELT	Ldep_03	0.9584	0.0252	0.7597	0.0472	152	173	311	314	252	260	122	125	118	118	0	0	265	268	148	148	274	277	308	315	144	153	586.405	-0.030123	-0.0109795	0.245976	0.374217	40
DELT30	2009	39.8898	0.474167	DELT	Ldep_19	0.0031	0.0307	0.6793	0.1051	135	135	311	311	255	255	113	119	108	118	171	181	264	264	148	151	277	277	336	312	150	150	600.786	-0.0045228	0.0114619	0.522066	0.693325	45
DELT31	2009	39.8898	0.474167	DELT	Ldep_02	0.004	0.0312	0.6339	0.2249	152	156	269	311	252	264	113	119	110	120	175	181	260	262	145	148	277	277	295	298	150	150	593.987	0.00701448	-0.0104187	0.646491	0.382191	46
DELT32	2009	39.8898	0.474167	DELT	Ldep_19	0.003	0.0326	0.6959	0.3481	135	135	311	311	252	264	125	128	108	118	173	177	259	264	148	148	274	274	310	324	149	150	586.985	-0.0261746	-0.00994709	0.288559	0.388898	45
DELT33	2009	39.8898	0.474167	DELT			0.0301	0.6823	0.6781	135	135	311	311	258	258	119	122	110	118	175	194	259	261	148	148	277	277	298	313	150	150	544.412	0.0204185	-0.00597141	0.791049	0.44543	43
DELT34	2009	40.3563	0.8055	DELT			0.0603	0.5659	0.4356	140	152	311	311	239	258	119	119	118	118	175	179	262	264	148	148	277	277	300	300	149	149	661.232	-0.0142675	0.00954487	0.416972	0.666065	48
DELT35	2009	40.3563	0.8055	DELT			0.0321	0.6575	0.3487	118	148	311	311	258	258	116	122	118	118	0	0	260	260	148	148	274	277	296	314	150	150	657.544	-0.00430991	0.00812262	0.524362	0.645841	51
DELT36	2009	40.3563	0.8055	DELT			0.0723	0.6461	0.7079	127	152	311	311	252	258	119	119	118	124	173	173	261	261	148	148	274	274	284	285	150	149	607.352	0.0184817	-0.00493488	0.770161	0.460169	49
DELT37	2009	40.3285	0.962833	DELT			0.0491	0.6145	0.6193	144	164	311	311	249	264	119	119	118	118	175	175	260	264	148	148	274	277	283	283	147	149
DELT38	2009	40.3563	0.8055	DELT																												594.48	-0.0265885	-0.00944259	0.284094	0.396072	43
DELT40	2009	40.3563	0.8055	DELT																												589.414	0.0272191	0.010772	0.864391	0.683515	51
DELT41	2009	40.3563	0.8055	DELT																												548.046	0.0297776	0.00695686	0.891983	0.629265	47
DELT42	2009	40.3563	0.8055	DELT																												571.036	-0.00231423	-0.00980991	0.545884	0.390848	51
DELT43	2009	39.8373	0.715167	DELT																												557.84	-0.00511011	-0.00798431	0.515732	0.416808	38
DELT44	2009	39.8373	0.715167	DELT																												584.87	-0.0203359	0.00349331	0.351527	0.580015	40
DELT45	2009	39.8373	0.715167	DELT																												510.319	0.0272707	-0.00538296	0.864948	0.453798	39
DELT46	2009	39.8373	0.715167	DELT																												496.528	0.0267492	-0.00191093	0.859323	0.503168	43
DELT47	2009	39.8373	0.715167	DELT																												493.577	-0.0327798	-0.00582384	0.217324	0.447529	45
DELT48	2009	40.0192	0.561	DELT																												566.71	-0.0328468	-0.0127445	0.216601	0.34912	43
DELT49	2009	40.0192	0.561	DELT																												553.22	0.00523656	-0.00563882	0.627317	0.450159	43
DELT50	2009	40.3065	1.1235	DELT																												578.786	-0.0104879	-0.0181901	0.457734	0.271686	45
CCAT01	2009	41.1038	1.54717	CCAT	Ldep_02	0.0067	0.1536	0.5357	0.0233	135	144	311	311	272	283	113	116	118	118	173	175	264	266	148	148	277	277	0	0	150	150	513.837	-0.0189584	0.0126751	0.366383	0.710575	44
CCAT02	2009	41.1038	1.54717	CCAT	Ldep_02	0.0065	0.1962	0.4777	0.0235	140	140	309	309	246	258	122	125	118	118	175	181	264	266	148	148	274	277	296	308	150	153	503.613	-0.0300344	-0.00101564	0.246932	0.515899	45
CCAT03	2009	41.1038	1.54717	CCAT	Ldep_02	0.0067	0.1144	0.6492	0.0235	152	223	311	311	261	264	122	125	118	121	165	171	259	268	148	148	274	277	325	325	150	150	446.923	0.00851635	0.00862818	0.662688	0.65303	43
CCAT04	2009	41.1038	1.54717	CCAT	Ldep_02	0.0065	0.1731	0.5418	0.0234	127	140	311	311	255	255	110	122	118	118	177	183	261	265	148	148	274	274	298	300	149	150	551.923	-0.00456312	-0.00253225	0.521631	0.494334	43
CCAT05	2009	41.1038	1.54717	CCAT	Ldep_02	0.0066	0.1788	0.4989	0.0471	140	160	311	311	255	264	119	125	118	128	175	177	265	264	148	148	274	274	298	300	150	149	558.764	-0.00484884	-0.0147987	0.518549	0.31991	44
CCAT06	2009	41.1038	1.54717	CCAT	Ldep_03	0.9553	0.1578	0.5979	0.0232	148	181	311	311	243	252	119	122	114	118	175	177	259	261	148	148	274	274	317	327	150	149	513.965	-0.0153971	0.00799769	0.404791	0.644065	41
CCAT07	2009	41.0853	1.33833	CCAT	Ldep_02	0.0068	0.243	0.4484	0.1677	144	150	311	311	249	249	122	122	118	120	173	179	258	258	148	148	277	277	290	294	150	156	540.365	0.0280882	0.0117328	0.873764	0.697177	39
CCAT08	2009	42.262	3.3145	CCAT	Ldep_02	0.0067	0.2098	0.4578	0.0703	140	152	311	311	255	264	116	122	110	118	175	175	260	261	148	148	274	277	284	302	150	150	564.694	0.0195172	-0.0226158	0.781329	0.208754	43
CCAT09	2009	42.262	3.3145	CCAT	Ldep_02	0.0067	0.115	0.6041	0.0703	135	156	311	311	261	261	119	125	118	118	171	177	261	262	151	154	274	277	303	306	150	150	537.95	0.00373849	-0.000799615	0.611161	0.518971	45
CCAT10	2009	42.262	3.3145	CCAT	Ldep_02	0.0065	0.1344	0.5695	0.0703	144	148	269	311	252	258	119	125	110	124	167	177	259	259	148	151	274	274	300	314	150	150	582.44	0.0117317	-0.00387857	0.697365	0.475189	43
CCAT11	2009	42.262	3.3145	CCAT	Ldep_55	0.0084	0.112	0.7086	0.0704	150	168	311	311	252	276	113	131	106	118	181	181	258	261	148	154	274	277	306	341	150	150	557.103	-0.0274853	-0.00379118	0.274423	0.476432	43
CCAT12	2009	42.262	3.3145	CCAT	Ldep_65	0.9327	0.2312	0.4896	0.2703	148	160	311	311	258	261	113	113	121	121	171	175	259	262	148	148	277	277	316	322	149	149	556.316	0.0262647	-0.00409497	0.854098	0.472112	43
CCAT13	2009	42.262	3.3145	CCAT	Ldep_02	0.0067	0.1954	0.4482	0.0704	131	140	277	301	257	261	113	122	118	120	175	175	262	262	148	148	274	274	298	312	150	150	609.914	-0.017649	0.00832998	0.380504	0.64879	37
CCAT14	2009	42.262	3.3145	CCAT	Ldep_55	0.0083	0.2541	0.3948	0.0705	131	148	311	311	258	294	119	119	110	118	179	179	258	258	148	148	277	277	308	312	150	150	469.676	0.0234468	0.0107651	0.823708	0.683417	39
CCAT15	2009	42.262	3.3145	CCAT	Ldep_02	0.0065	0.1244	0.6005	0.0742	135	152	311	311	252	258	110	119	118	118	166	177	259	264	148	148	274	277	270	298	150	153	572.838	0.0239198	0.00814527	0.828809	0.646163	34
CCAT16	2009	42.262	3.3145	CCAT	Ldep_65	0.9333	0.1814	0.4999	0.1202	140	156	269	311	252	252	119	119	118	123	173	175	259	262	148	154	274	274	302	304	149	150	533.557	-0.000365089	0.00347	0.566905	0.579683	43
CCAT17	2009	42.262	3.3145	CCAT	Ldep_66	0.9081	0.2594	0.4449	0.2136	148	160	311	311	255	261	116	122	118	118	175	185	258	259	148	148	274	274	308	322	150	155	542.44	-0.018729	0.00646071	0.368857	0.62221	44
CCAT18	2009	42.262	3.3145	CCAT	Ldep_02	0.0067	0.2248	0.4924	0.0703	140	144	311	311	251	267	119	122	118	118	177	185	261	266	145	148	274	274	310	312	150	150	511.487	0.000129873	0.00697829	0.572243	0.62957	46
CCAT19	2009	42.262	3.3145	CCAT	Ldep_02	0.0067	0.2858	0.4396	0.3954	148	148	311	311	252	261	116	119	112	120	167	175	258	261	148	148	277	277	300	300	149	155	531.976	0.0324086	-0.00656904	0.920358	0.436932	39
CCAT20	2009	42.262	3.3145	CCAT	Ldep_65	0.9329	0.1262	0.6406	0.0703	140	156	302	311	252	258	125	125	112	139	177	177	261	265	148	148	274	277	317	320	150	150	505.601	0.018978	-0.00620676	0.775514	0.442084	45
CCAT21	2009	42.262	3.3145	CCAT	Ldep_02	0.0064	0.1911	0.5137	0.1236	113	135	269	311	252	252	110	119	118	118	179	179	259	264	148	148	274	274	304	323	144	149	544.677	-0.0199301	0.00597022	0.355903	0.615235	43
CCAT22	2009	42.262	3.3145	CCAT	Ldep_02	0.0067	0.2254	0.4804	0.2135	140	148	269	311	255	258	119	119	118	118	173	175	260	264	148	148	274	274	296	303	150	155
CCAT23	2009	42.262	3.3145	CCAT	Ldep_02	0.0067	0.2526	0.3755	0.0706	135	140	311	311	252	255	113	122	121	121	153	177	258	266	148	148	274	274	304	310	150	150
CCAT24	2009	42.262	3.3145	CCAT	Ldep_02	0.0067	0.2376	0.4377	0.1205	144	154	311	311	249	258	119	119	118	118	173	175	261	264	148	151	274	274	298	300	149	150
CCAT25	2009	42.262	3.3145	CCAT	Ldep_02	0.0067	0.1651	0.4545	0.0704	144	148	311	311	252	261	116	128	118	120	171	175	262	264	148	148	274	274	294	316	150	150
CCAT26	2009	42.262	3.3145	CCAT	Ldep_02	0.0066	0.2592	0.4512	0.2158	140	140	311	311	249	252	116	122	110	118	148	173	262	261	148	148	274	274	314	317	150	152
CCAT27	2009	42.262	3.3145	CCAT	Ldep_02	0.0069	0.1534	0.5026	0.0703	140	152	269	311	245	261	119	122	118	120	173	175	258	264	148	148	277	277	304	320	150	150
CCAT28	2009	42.262	3.3145	CCAT	Ldep_67	0.006	0.3899	0.4286	0.2704	131	144	311	314	252	258	116	119	118	118	165	177	258	266	148	148	274	274	280	312	149	149
LION01	2009	43.117	3.655	LION	Ldep_68	0.021																										589.989	0.00397218	0.0168292	0.613681	0.769646	49
LION02	2009	43.117	3.655	LION	Ldep_03	0.9466																										627.434	0.0256587	-0.00899519	0.847563	0.402433	54
LION03	2009	43.117	3.655	LION	Ldep_01	0.9616																										537.802	0.000802345	-0.00291695	0.579495	0.488863	45
LION04	2009	43.117	3.655	LION	Ldep_02	0.014																										552.47	-0.0191265	0.0151122	0.36457	0.745231	45
LION05	2009	43.117	3.655	LION	Ldep_21	0.9597																										622.972	-0.0168291	-0.00785	0.389346	0.418717	52
LION06	2009	43.117	3.655	LION																												681.158	-0.00268878	-0.0372965	0.541845	0	58
LION07	2009	43.117	3.655	LION	Ldep_02	0.014																										652.982	-0.000579989	-0.0157714	0.564588	0.306078	55
LION08	2009	43.117	3.655	LION	Ldep_03	0.9469																										576.34	0.0198783	-0.0120395	0.785223	0.359145	48
LION09	2009	43.117	3.655	LION	Ldep_02	0.0139																										621.378	0.0254677	-0.00133942	0.845503	0.511295	52
LION10	2009	43.117	3.655	LION																												573.753	0.028249	0.000236027	0.875498	0.533697	49
LION11	2009	43.117	3.655	LION																												586.491	-0.0167071	0.00370658	0.390662	0.583047	49
LION12	2009	43.117	3.655	LION																												575.925	0.00750809	-0.0170242	0.651815	0.288263	49
LION13	2009	43.117	3.655	LION																												698.084	-0.0247431	-0.00454889	0.303997	0.465658	57
LION14	2009	43.117	3.655	LION																												518.165	-0.0288475	0.00164491	0.259732	0.553731	43
LION15	2009	43.117	3.655	LION	Ldep_03	0.9471																										608.327	-0.0057689	-0.00346839	0.508627	0.481022	50
LION16	2009	43.117	3.655	LION	Ldep_02	0.0141																										505.491	-0.0202325	0.0131235	0.352642	0.716952	41
LION17	2009	43.117	3.655	LION	Ldep_02	0.0139																										608.093	-0.013234	-0.00219788	0.428119	0.499088	51
LION18	2009	43.117	3.655	LION	Ldep_02	0.0138																										578.734	0.000653988	-0.00981673	0.577896	0.390751	48
LION19	2009	43.117	3.655	LION	Ldep_28	0.5774
LION20	2009	43.117	3.655	LION	Ldep_69	0.0209																										610.891	-0.0341019	-0.0100358	0.203065	0.387636	49
LION21	2009	43.117	3.655	LION	Ldep_02	0.0139																										581.833	0.0199727	-0.0125986	0.786242	0.351194	50
LION22	2009	43.117	3.655	LION	Ldep_70	0.0096
LION23	2009	43.117	3.655	LION																												561.921	0.0358867	-0.00363218	0.957868	0.478693	48
LION24	2009	43.117	3.655	LION																												514.375	0.00830549	-0.00786333	0.660414	0.418528	43
LION25	2009	43.117	3.655	LION	Ldep_28	0.5766																										623.301	-0.00299007	-0.0121283	0.538596	0.357882	51
LION26	2009	43.117	3.655	LION																												516.385	0.00443196	0.0095898	0.61864	0.666704	43
LION27	2009	43.117	3.655	LION	Ldep_02	0.0142																										561.279	0.01471	-0.0177621	0.729484	0.277772	48
LION28	2009	43.117	3.655	LION	Ldep_02	0.0139																										606.031	0.00867405	-0.0132005	0.664389	0.342636	51
LION29	2009	43.117	3.655	LION	Ldep_02	0.014																										627.181	-0.0325736	-0.0295284	0.219548	0.110459	52
LION30	2009	43.117	3.655	LION	Ldep_02	0.0139																										562.486	0.024989	0.00075568	0.84034	0.541087	47
LION31	2009	43.117	3.655	LION	Ldep_02	0.0139																										657.59	-0.000555972	-0.000251596	0.564847	0.526764	55
LION32	2009	43.117	3.655	LION	Ldep_02	0.014																										550.669	0.0199099	-0.0168529	0.785564	0.2907	47
LION33	2009	43.117	3.655	LION	Ldep_02	0.0139																										603.462	-0.0151794	0.00211476	0.407138	0.560412	50
LION34	2009	43.117	3.655	LION																												613.915	-0.0271139	-0.0182369	0.278429	0.27102	51
ADRI01	2009	45.1255	12.4448	ADRI	Ldep_19	0.0015	0.0332	0.8152	0.0838	168	164	311	311	258	251	119	119	115	174	183	183	261	264	148	148	274	274	298	302	150	149
ADRI02	2009	45.1255	12.4448	ADRI	Ldep_19	0.0017	0.0209	0.8152	0.0465	164	176	311	311	258	279	119	125	120	120	167	179	261	266	148	148	274	274	283	285	150	150
ADRI03	2009	45.1255	12.4448	ADRI	Ldep_02	0.0021	0.0336	0.7729	0.0466	144	148	311	311	258	279	110	110	118	121	171	179	259	265	148	148	274	274	284	296	150	150
ADRI04	2009	45.1255	12.4448	ADRI	Ldep_71	0.0014	0.0245	0.8407	0.084	164	176	269	311	261	261	119	122	118	118	167	177	260	268	148	148	274	277	297	346	150	149
ADRI05	2009	45.1255	12.4448	ADRI	Ldep_02	0.0022	0.0257	0.7923	0.0481	144	148	311	311	239	264	113	122	108	118	175	179	254	262	148	154	274	274	283	299	144	144
ADRI06	2009	45.1255	12.4448	ADRI	Ldep_19	0.0016	0.0353	0.7843	0.0472	176	190	311	311	255	258	113	113	118	139	177	181	259	258	148	148	274	274	295	324	144	150
ADRI07	2009	45.1255	12.4448	ADRI	Ldep_02	0.002	0.0322	0.7595	0.0465	144	166	311	311	258	264	113	119	118	118	175	177	260	261	148	148	277	277	304	311	150	150
ADRI08	2009	45.1255	12.4448	ADRI	Ldep_02	0.0022	0.0533	0.7031	0.0465	127	127	311	314	252	255	113	119	118	121	171	175	260	264	148	148	274	277	284	308	150	150
ADRI09	2009	45.1255	12.4448	ADRI	Ldep_19	0.0016	0.035	0.8022	0.0492	133	140	311	311	243	260	119	119	118	124	177	177	259	261	148	148	267	274	314	316	150	153
ADRI10	2009	45.1255	12.4448	ADRI	Ldep_02	0.0021	0.0285	0.7619	0.0465	135	160	311	311	249	252	119	134	118	121	177	177	259	265	148	148	277	277	300	317	150	150
ADRI11	2009	45.1255	12.4448	ADRI	Ldep_02	0.002	0.0632	0.766	0.1835	135	140	311	311	252	261	122	122	118	118	165	177	259	259	148	148	274	277	327	350	150	155
ADRI12	2009	45.1255	12.4448	ADRI	Ldep_02	0.002	0.0719	0.6888	0.0465	140	148	301	311	249	252	113	119	118	118	175	175	258	259	145	148	274	280	283	324	150	150
ADRI13	2009	45.1255	12.4448	ADRI	Ldep_02	0.0022	0.0281	0.7876	0.0465	152	160	311	311	261	261	116	119	118	124	175	183	259	259	148	148	274	277	297	297	150	150
ADRI14	2009	45.1255	12.4448	ADRI	Ldep_72	0.0033	0.0492	0.8003	0.0838	148	150	311	311	249	267	113	125	112	118	150	165	258	259	148	160	274	274	335	306	150	149
ADRI15	2009	45.1255	12.4448	ADRI	Ldep_02	0.0021	0.1393	0.7437	0.3934	122	127	311	311	257	264	116	119	112	118	175	175	260	267	148	148	274	274	310	327	149	152
ADRI16	2009	45.1255	12.4448	ADRI	Ldep_02	0.0022	0.1135	0.7059	0.3936	140	144	277	311	254	264	113	125	118	121	175	177	258	259	148	154	274	277	310	310	149	155
ADRI17	2009	45.1255	12.4448	ADRI	Ldep_19	0.0016	0.0274	0.8031	0.047	113	140	311	311	255	255	110	119	118	121	186	188	258	259	148	148	274	277	301	335	144	150
ADRI18	2009	45.1255	12.4448	ADRI	Ldep_19	0.0017	0.0205	0.8432	0.0493	140	156	269	311	252	267	119	119	142	142	153	153	267	265	148	160	277	277	295	301	150	153
ADRI19	2009	45.1255	12.4448	ADRI	Ldep_02	0.0023	0.0357	0.8142	0.0839	144	164	311	311	252	258	110	125	115	124	165	175	259	264	148	148	274	277	336	313	149	150
ADRI20	2009	45.1255	12.4448	ADRI	Ldep_19	0.0016	0.0264	0.8348	0.049	156	173	311	311	255	264	104	125	118	118	177	177	261	261	138	148	274	277	305	299	150	156
ADRI21	2009	45.1255	12.4448	ADRI	Ldep_19	0.0016	0.0213	0.811	0.0468	144	152	311	311	252	261	119	125	118	121	177	177	260	260	148	148	274	274	301	301	150	150
ADRI22	2009	45.1255	12.4448	ADRI	Ldep_73	0.0068	0.0291	0.8248	0.0466	135	148	286	311	258	266	116	119	115	115	175	177	259	261	148	148	274	274	287	306	150	150
ADRI23	2009	45.1255	12.4448	ADRI	Ldep_02	0.0022	0.0276	0.804	0.0491	135	148	301	311	255	258	116	122	115	118	179	181	260	260	148	148	274	274	280	283	150	153
ADRI24	2009	45.1255	12.4448	ADRI			0.0303	0.7363	0.0473	135	148	311	311	239	252	119	125	118	118	181	181	264	267	148	148	277	277	295	312	144	150
ADRI25	2009	45.1255	12.4448	ADRI			0.0375	0.7641	0.0466	144	160	311	311	246	252	119	119	121	174	171	179	259	261	148	148	274	274	279	322	150	150
ADRI26	2009	45.1255	12.4448	ADRI	Ldep_74	0.0033	0.0438	0.7883	0.0989	156	160	311	311	252	255	116	119	118	121	173	175	256	265	148	148	0	0	327	341	149	153
ADRI27	2009	45.1255	12.4448	ADRI	Ldep_75	0.0074	0.0236	0.8242	0.0491	135	160	269	311	246	246	113	122	118	118	169	175	259	264	148	148	274	274	319	366	150	153
ADRI28	2009	45.1255	12.4448	ADRI	Ldep_02	0.0022	0.0282	0.839	0.084	156	176	311	311	243	248	119	119	118	128	165	179	254	260	148	148	274	274	297	299	150	149
ADRI29	2009	45.1255	12.4448	ADRI			0.0396	0.7717	0.0839	135	140	311	311	258	284	110	119	114	118	177	179	261	266	148	148	274	277	364	304	150	149
ADRI30	2009	45.1255	12.4448	ADRI			0.0735	0.7181	0.2428	144	148	311	311	261	273	119	122	118	118	173	175	261	264	148	148	274	277	295	301	149	149
ADRI31	2009	45.1255	12.4448	ADRI	Ldep_02	0.002
GREE01	2005	38.1167	21.1833	GREE	Ldep_25	0.0062	0.0706	0.7629	0.6191	148	160	269	311	252	279	113	119	120	120	175	179	260	264	148	148	277	277	312	320	150	150
GREE02	2005	38.1167	21.1833	GREE	Ldep_02	0.0043	0.0821	0.7731	0.6183	0	0	269	311	252	252	113	119	118	120	179	183	260	262	148	151	0	0	312	320	150	149
GREE03	2005	38.1167	21.1833	GREE	Ldep_02	0.0045	0.1305	0.8103	0.6188	148	190	311	311	252	255	110	122	118	118	173	173	260	260	148	151	274	274	315	315	149	155
GREE04	2005	38.1167	21.1833	GREE	Ldep_76	0.2488	0.1258	0.8221	0.2246	140	162	302	311	258	258	119	128	118	118	171	175	260	261	148	148	274	274	333	280	150	155
GREE05	2005	38.1167	21.1833	GREE	Ldep_56	0.0077	0.2546	0.6398	0.3488	148	164	311	311	255	257	113	119	108	118	175	175	260	261	148	148	0	0	294	304	149	150
GREE06	2005	38.1167	21.1833	GREE	Ldep_02	0.0044	0.2209	0.7561	0.3488	135	144	309	311	252	255	110	122	118	118	167	175	259	259	148	148	274	277	302	302	152	155
GREE07	2005	38.1167	21.1833	GREE	Ldep_02	0.0043	0.1555	0.7993	0.2246	127	148	311	311	255	258	122	125	118	174	165	179	259	259	148	148	274	277	286	324	149	149
GREE08	2005	38.1167	21.1833	GREE	Ldep_77	0.006	0.1491	0.7822	0.2247	131	135	269	311	243	249	119	119	108	120	169	169	260	266	148	148	274	277	285	298	149	149
GREE09	2005	38.1167	21.1833	GREE	Ldep_02	0.0044	0.1124	0.8376	0.3492	122	150	311	311	249	258	110	122	118	118	165	185	261	265	148	148	0	0	275	282	149	149
GREE10	2005	38.1167	21.1833	GREE	Ldep_78	0.0051	0.0873	0.8735	0.6784	156	193	269	311	252	258	119	119	115	115	177	177	261	265	148	148	271	271	299	348	149	149
GREE11	2005	38.1167	21.1833	GREE	Ldep_02	0.0043	0.0979	0.7488	0.6184	148	224	311	311	258	264	116	119	118	124	173	175	260	262	148	148	277	277	297	297	150	150
GREE12	2005	38.1167	21.1833	GREE	Ldep_19	0.0035	0.1822	0.7594	0.3491	127	144	311	311	255	258	113	119	118	118	173	177	261	261	148	148	274	274	272	327	150	149
GREE13	2005	38.1167	21.1833	GREE	Ldep_02	0.0044	0.1282	0.8095	0.2246	131	135	302	311	255	258	119	122	121	121	169	185	256	261	148	151	0	0	284	350	149	150
GREE14	2005	38.1167	21.1833	GREE	Ldep_02	0.0042	0.0984	0.7457	0.3488	127	152	269	311	252	264	110	119	118	118	181	183	259	261	148	148	274	277	304	310	150	150
GREE15	2005	38.1167	21.1833	GREE	Ldep_02	0.0044	0.0847	0.8219	0.6198	144	168	311	311	258	258	125	125	118	139	177	177	259	264	148	148	274	274	291	306	150	150
GREE16	2005	38.1167	21.1833	GREE	Ldep_02	0.0044	0.0874	0.8256	0.349	152	168	311	311	255	261	119	119	112	118	150	177	260	261	148	148	274	277	283	315	149	150
GREE17	2005	38.1167	21.1833	GREE	Ldep_02	0.0044	0.182	0.8229	0.3487	148	173	311	314	252	264	113	119	108	108	175	177	260	261	148	148	274	274	278	330	149	155
GREE18	2005	38.1167	21.1833	GREE	Ldep_02	0.0043	0.1554	0.7793	0.2245	160	170	311	311	257	261	113	119	118	118	175	175	256	261	148	148	277	277	320	320	149	149
GREE19	2005	38.1167	21.1833	GREE	Ldep_02	0.0043	0.0907	0.8122	0.3492	135	140	269	304	261	267	119	122	118	121	175	181	259	264	148	148	274	277	299	318	149	150
GREE20	2005	38.1167	21.1833	GREE	Ldep_02	0.0044	0.0805	0.7809	0.6779	148	152	311	311	252	267	119	119	115	118	175	175	265	264	148	148	274	274	282	301	150	150
GREE21	2005	38.1167	21.1833	GREE	Ldep_02	0.0043
GREE22	2005	38.1167	21.1833	GREE	Ldep_02	0.0044	0.11	0.7747	0.6181	156	156	311	314	258	261	110	122	118	118	153	179	254	266	148	148	274	274	304	347	150	149
GREE23	2005	38.1167	21.1833	GREE	Ldep_02	0.0045	0.1249	0.7927	0.0703	135	160	311	311	258	261	113	122	118	121	167	177	259	259	148	148	274	274	280	295	149	149
GREE24	2005	38.1167	21.1833	GREE	Ldep_02	0.0044	0.1085	0.7566	0.0742	131	140	311	311	255	258	110	110	118	118	175	177	259	265	148	148	274	274	283	312	149	150
GREE25	2005	38.1167	21.1833	GREE	Ldep_02	0.0043	0.1149	0.7668	0.0705	140	144	311	311	267	273	116	119	118	118	175	177	259	265	148	148	274	274	283	312	149	150
GREE26	2005	38.1167	21.1833	GREE	Ldep_02	0.0044	0.1512	0.7823	0.1204	140	168	267	311	243	270	113	122	118	124	171	181	260	264	148	151	274	277	284	295	150	150
GREE27	2005	38.1167	21.1833	GREE	Ldep_02	0.0043	0.084	0.8247	0.1204	152	160	311	311	251	258	122	125	118	121	181	183	260	264	145	148	274	274	307	310	149	150
GREE28	2005	38.1167	21.1833	GREE	Ldep_02	0.0045	0.1892	0.8187	0.1204	127	152	311	311	239	252	110	110	118	124	173	175	261	264	145	145	274	274	282	325	149	155
GREE29	2005	38.1167	21.1833	GREE	Ldep_02	0.0044	0.1178	0.8086	0.0741	0	0	0	0	239	252	119	119	118	118	175	177	260	262	148	160	274	277	341	315	149	149
GREE30	2005	38.1167	21.1833	GREE	Ldep_02	0.0043
